# Supplementary material for: Graphene decorated with molybdenum dioxide nanoparticles for use in high energy lithium ion capacitors with an organic electrolyte
Source: Royal Society of Chemistry journal article supplement (doi:10.1039/c3ta10853h), 2013-01-01
Supplement: c3ta10853h.pdf [file c3ta10853h.pdf]

## Supporting Information for

Graphene decorated with molybdenum dioxide nanoparticles for use in high energy lithium ion capacitors with an organic electrolyte

Pengxian Han,<sup>†a</sup> Wen Ma,<sup>†a,b</sup> Shuping Pang,<sup>a</sup> Qingshan Kong,<sup>a</sup> Jianhua Yao<sup>a</sup>, Caifeng Bi<sup>b</sup> and Guanglei Cui <sup>\*a</sup>

<sup>a</sup> *Qingdao Institute of Bioenergy and Bioprocess Technology, Chinese Academy of Sciences, Qingdao 266101, P. R. China. Fax: +86 532 80662744; Tel: +86 532 80662745; E-mail: cuigl@qibebt.ac.cn*

<sup>b</sup> *College of Chemistry and Chemical Engineering, Ocean University of China, Qingdao, 266100, P. R. China*

<sup>†</sup> These authors contributed equally to this work.

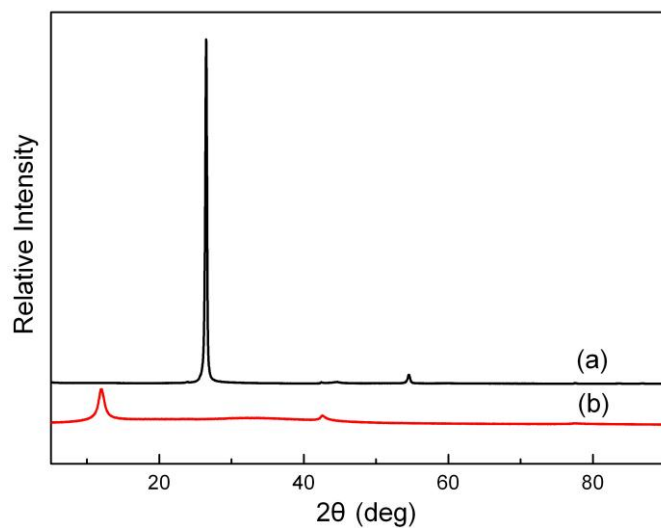

**Fig. S1** XRD patterns of (a) the pristine graphite powder and (b) GO.

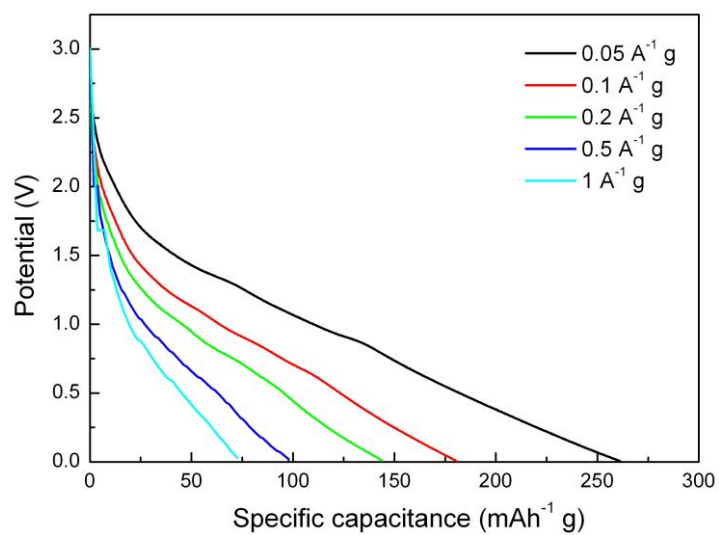

**Fig. S2** Plot of potential vs. capacity for G-MoO<sub>2</sub> based capacitor.

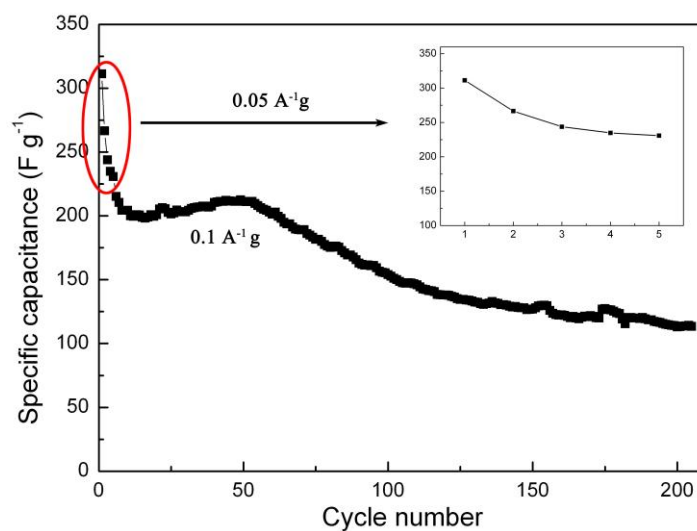

**Fig. S3** Cycle performance of MoO<sub>2</sub> based capacitor, the current density of the first five cycles is 0.05 A<sup>-1</sup> g, and then the following current density is 0.1 A<sup>-1</sup> g.
